# Supplementary material
Source: PubMed Central journal article supplement (PMC7486261)
Supplement: NIHMS1586278-supplement-2.pdf [file NIHMS1586278-supplement-2.pdf]

## SUPPLEMENTARY INFORMATION

### Mitochondrial ubiquinol oxidation is necessary for tumor growth

Inmaculada Martínez-Reyes<sup>1</sup>, Luzivette Robles Cardona<sup>1</sup>, Hyewon Kong<sup>1</sup>, Karthik Vasan<sup>1</sup>, Gregory S. McElroy<sup>1</sup>, Marie Werner<sup>1</sup>, Hermon Kihshen<sup>1</sup>, Colleen R. Reczek<sup>1</sup>, Samuel E. Weinberg<sup>1</sup>, Peng Gao<sup>2</sup>, Elizabeth M. Steinert<sup>1</sup>, Raul Piseaux<sup>1</sup>, G.R. Scott Budinger<sup>1</sup>, and Navdeep S. Chandel<sup>1,2</sup>

<sup>1</sup>Department of Medicine, Northwestern University Feinberg School of Medicine, Chicago, IL 60611

<sup>2</sup>Department of Biochemistry and Molecular Genetics, Northwestern University Feinberg School of Medicine, Chicago, IL 60611

<sup>3</sup>Robert H. Lurie Cancer Center Metabolomics Core, Northwestern University Feinberg School of Medicine, Chicago, IL 60611

\*Corresponding author:

Navdeep S. Chandel  
Northwestern University  
Feinberg School of Medicine  
McGaw Pavilion, Rm. M-334 240  
East Huron Street  
Chicago, IL 60611  
Phone: 312-503-2549  
E-mail: [nav@northwestern.edu](mailto:nav@northwestern.edu)

Supplementary Figures 1–6 show source data for western blots.

Supplementary Figure 7 shows the gating strategy for T-ALL experiments.

Supplementary Tables 1 shows the sequences of the sgRNAs used in this study.

A. Count of Lymphocytes

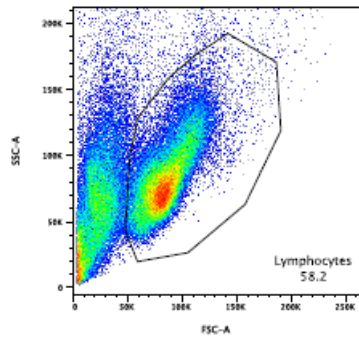

B. Count of PKH beads

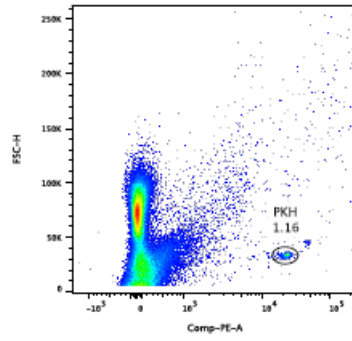

C. % (GFP+ and live / Lymphocytes)

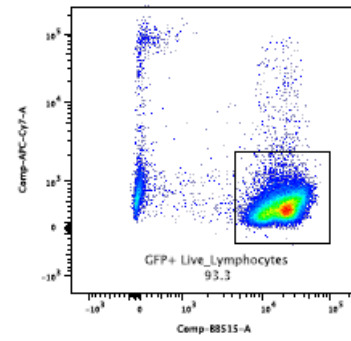

D. % (GFP+ / Live singlet)

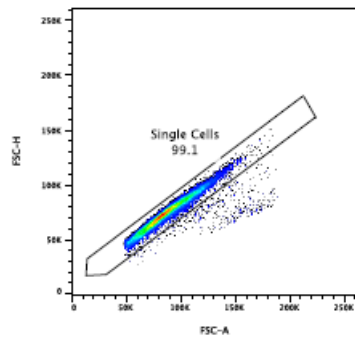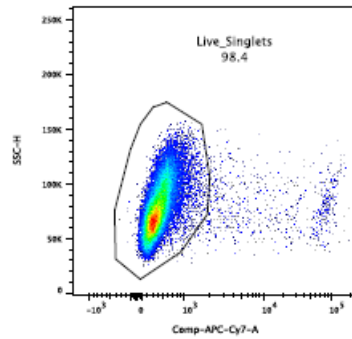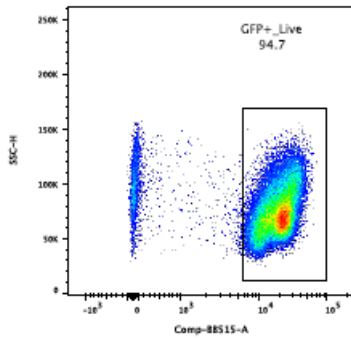

**Supplementary Figure 7. T-ALL Gating Strategy.** Representative flow plots from the bone marrow cells of a QPC-WT recipient. To determine the number of GFP+ cells, the flow plots in the upper row of the figure were used. The number was calculated using the following equation:  $(A / B) \times \text{PKH bead concentration (beads/ml)} \times \text{total volume of cell suspension (ml)} \times C$ . To determine the percentage of GFP+ cells, the flow plots in the lower row of the figure were used. The percentage was calculated as D.

| sgRNA ID               | Strand | Sequence             |
|------------------------|--------|----------------------|
| Human-sgNDUFS_1        | -      | GGTCACTCACCATTCCAAGG |
| Human-sgNDUFS2_2       | +      | CTGCAGCCGGAGTAAGATGG |
| Human-sgSDHA_1         | -      | GCCCATCACCTCGACCACGG |
| Human-sgDHODH_1        | -      | ATAGAAACGCTCATCTCCCG |
| Human-sgDHODH_2        | +      | GCTGCAGGATTTGACAAGCA |
| Human- sgNon-targeting | NA     | GTAGCGAACGTGTCCGGCGT |
| Mouse-sgQPC_1          | -      | GATCCCTACAGCGTTTGTAG |
| Mouse- sgNon-targeting | NA     | GCGAGGTATTCGGCTCCGCG |

**Supplementary Table 1. sgRNA sequences.**
