# Supplementary material
Source: PubMed Central journal article supplement (PMC7486261)
Supplement: NIHMS1586278-supplement-3.pdf [file NIHMS1586278-supplement-3.pdf]

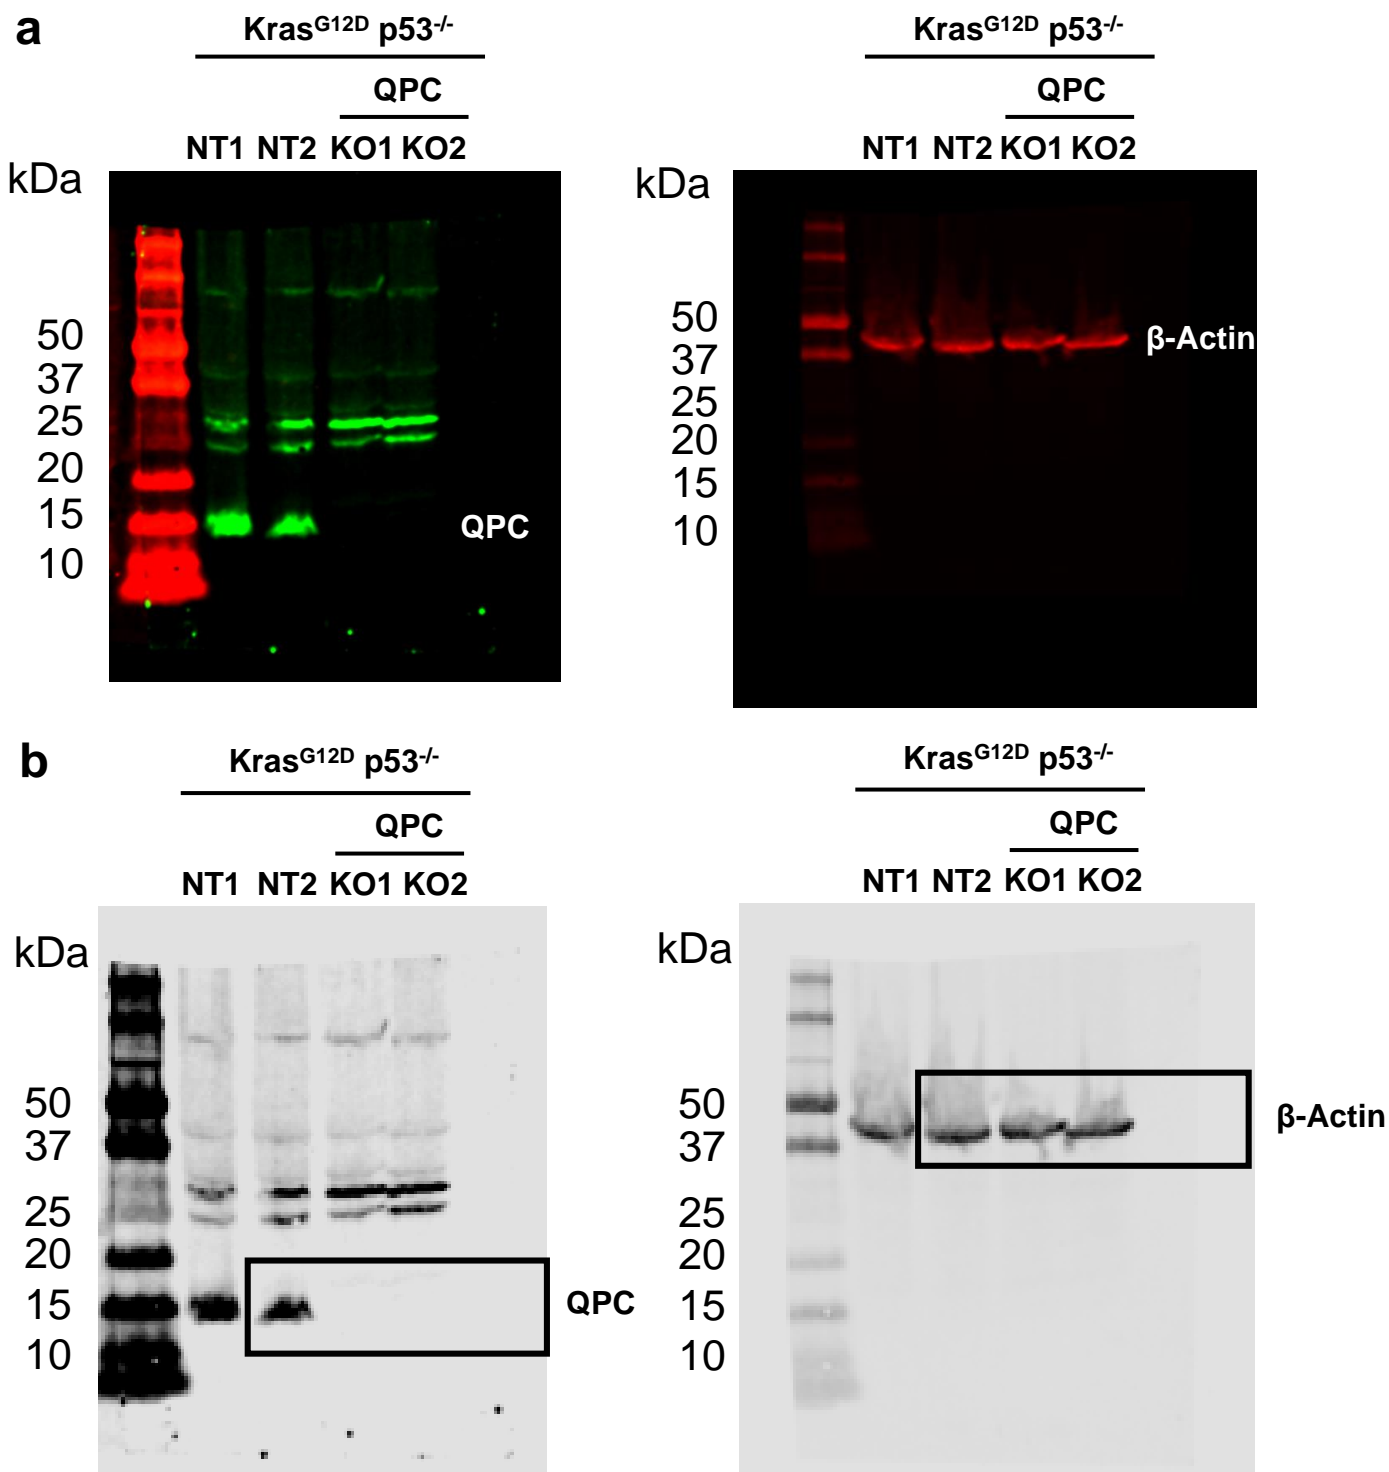

**Supplementary Figure 1. Original western blot for Figure 1c.** The full, uncut gel images of Figure 1c are shown. Control  $\beta$ -Actin was run on the same gel as loading control. The membrane was first blotted for QPC which was detected using IRDye 800CW goat anti-rabbit secondary antibody. The same membrane was then blotted for  $\beta$ -Actin using IRDye 680RD goat anti-mouse secondary. In **a and b** both 700 and 800 channels (left) or only channel 700 (right) are shown.

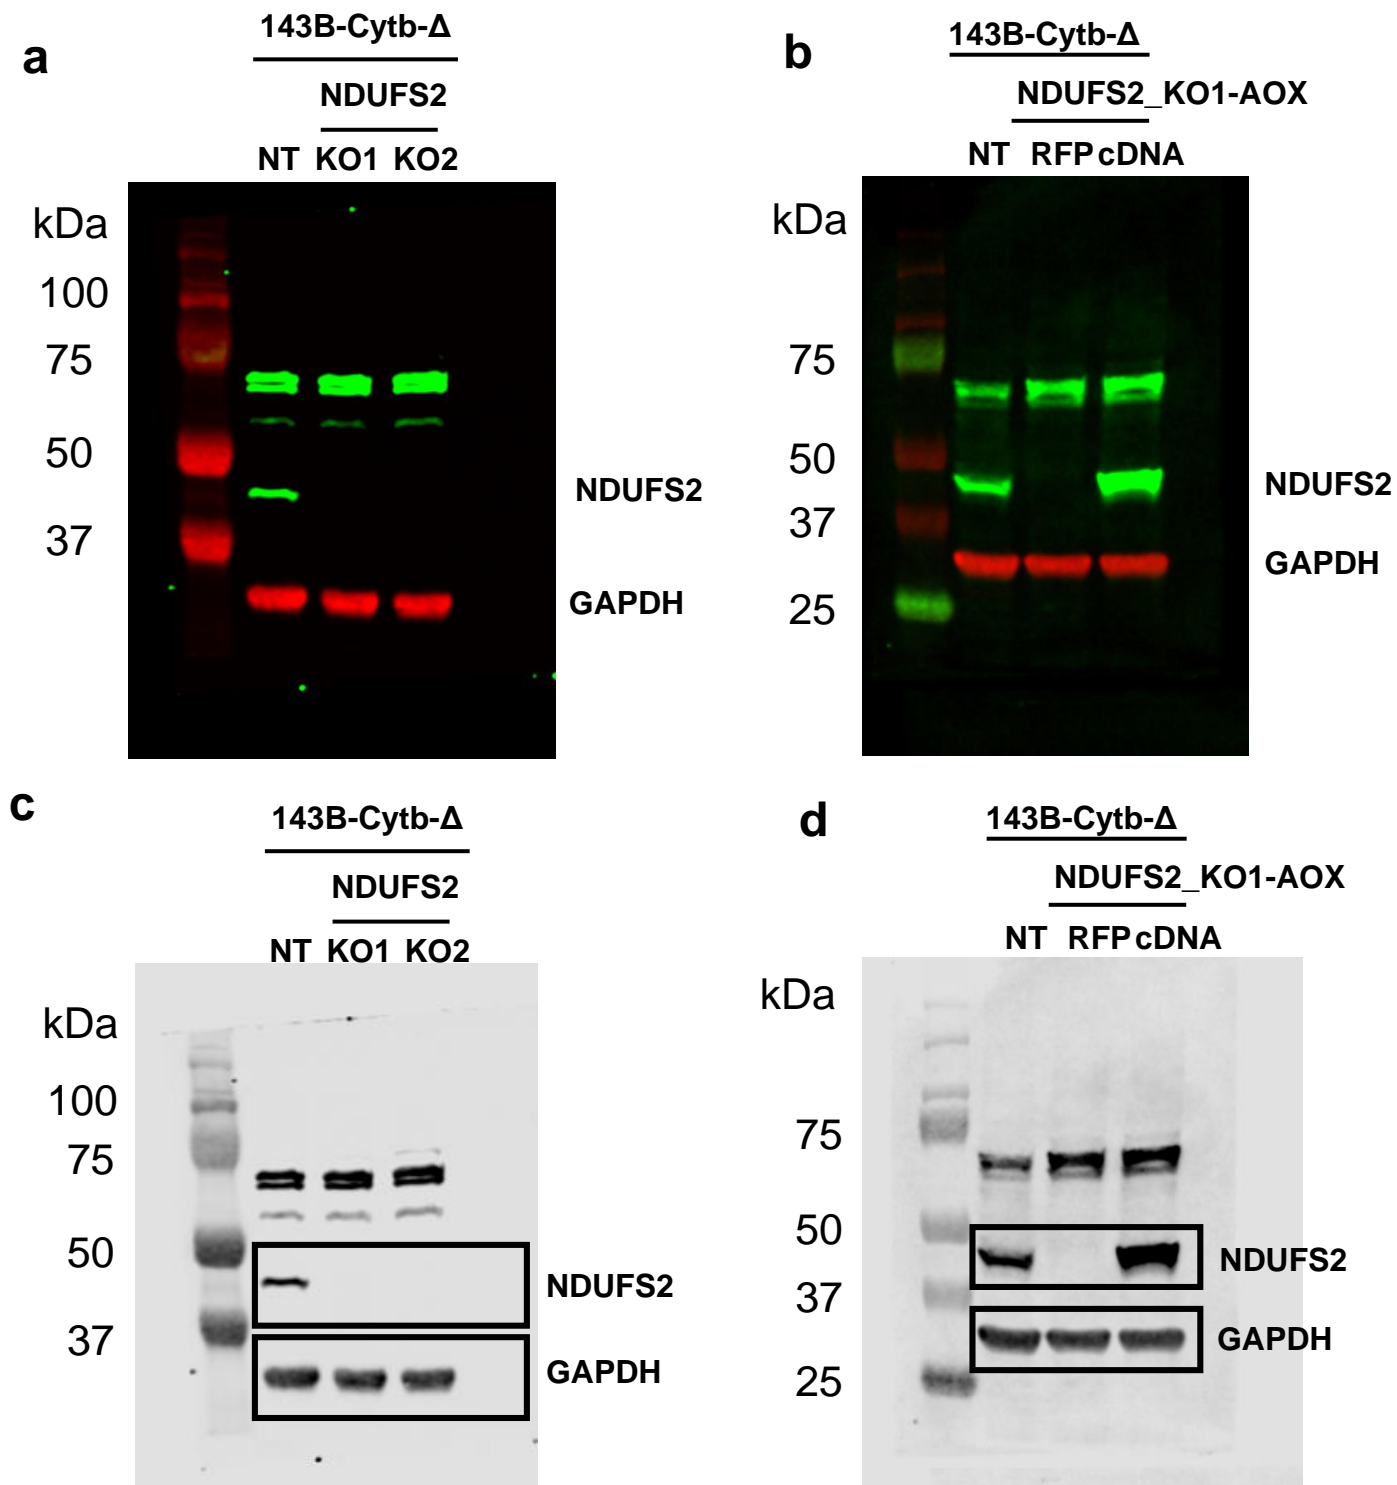

**Supplementary Figure 2. Original western blot for Figure 3a and Extended Figure 5c .** The full, uncut gel images of Figure 3a (a) and Extended Figure 5c (b) are shown. Control GAPDH was run on the same gel as loading control. IRDye 800CW goat anti-rabbit secondary antibody was used to detect NDUFS2 while IRDye 680RD goat anti-mouse secondary was used to detect GAPDH. In figures **a-d** both 700 and 800 channels are shown.

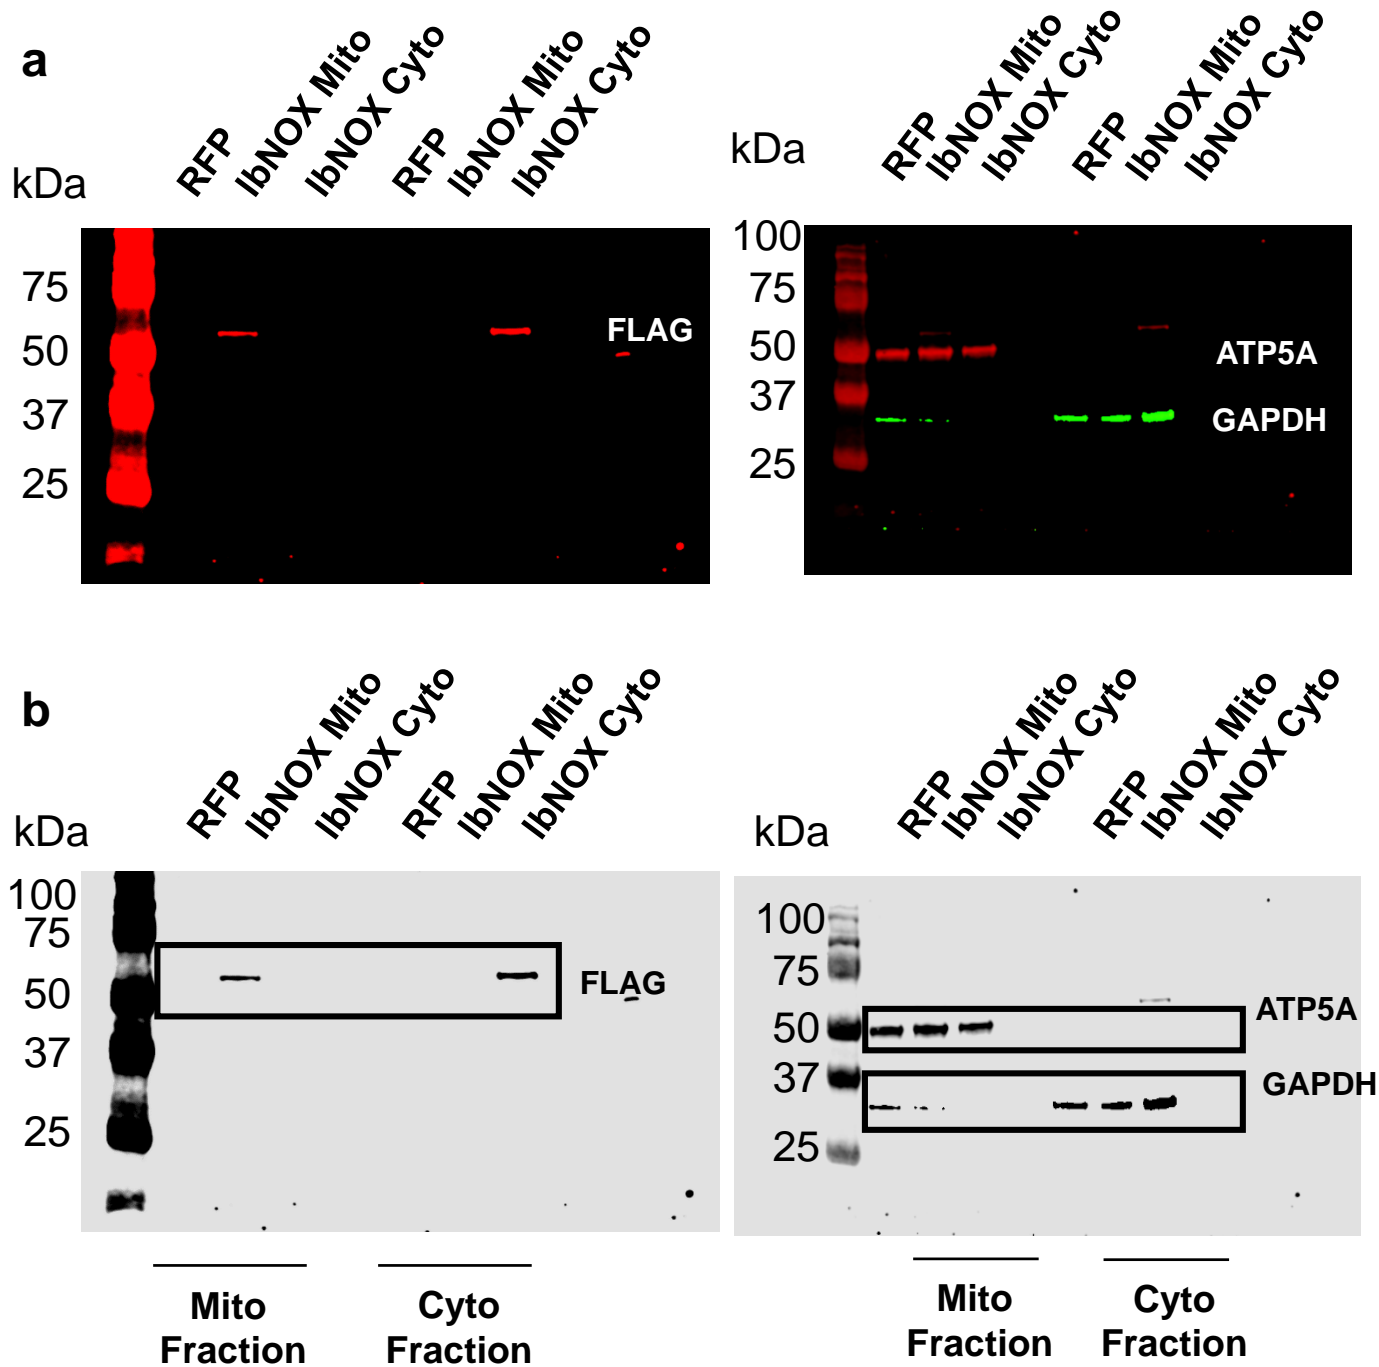

**Supplementary Figure 3. Original western blot for Figure 4a.** The full, uncut gel images of Figure 4a are shown. All proteins were blotted on the same gel. The membrane was first blotted for FLAG which was detected using IRDye 680RD goat anti-mouse secondary. The same membrane was then blotted for ATP5A and GAPDH. IRDye 800CW goat anti-rabbit secondary antibody was used to detect GAPDH while IRDye 680RD goat anti-mouse secondary was used to detect ATP5A. In figure b only channel 700 (left) or both 700 and 800 channels (right) are shown.

**a**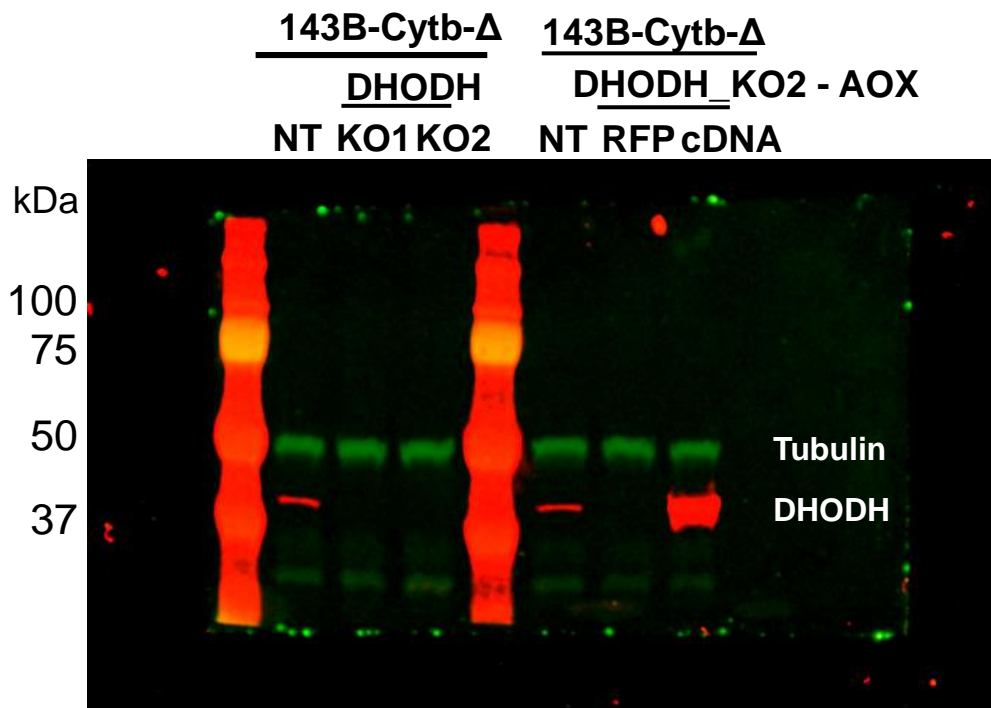**b**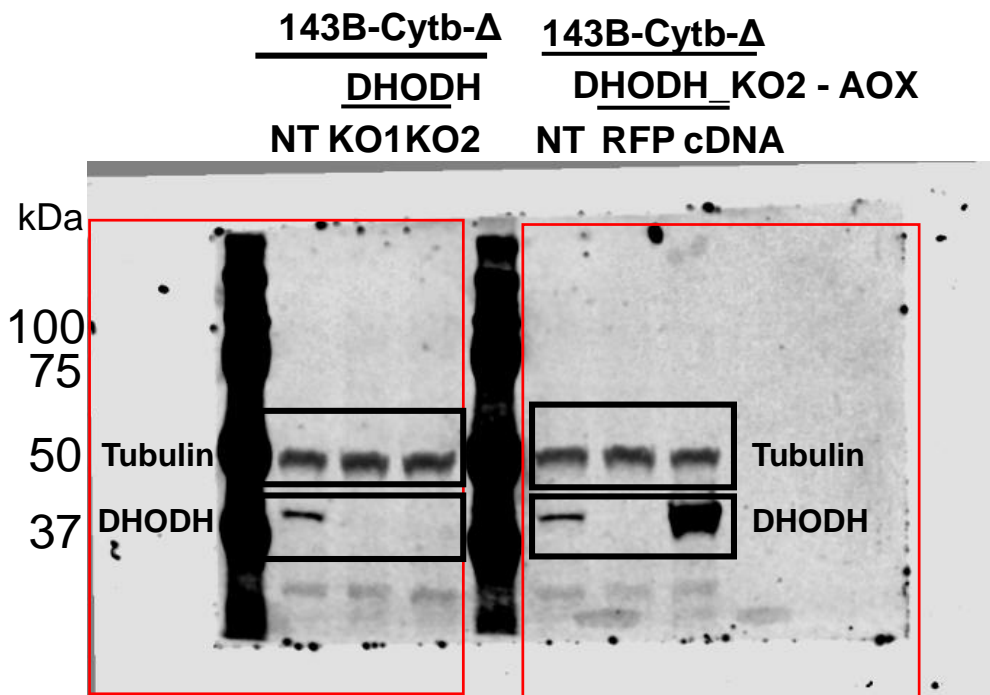

**Supplementary Figure 4. Original western blot for Extended Figure 4b and Extended Figure 4f. a and b,** The full, uncut gel images of Extended Figure 4b and Extended Figure 4f are shown. Control Tubulin was run on the same gel as loading control. IRDye 800CW goat anti-rabbit secondary antibody was used to detect Tubulin while IRDye 680RD goat anti-mouse secondary was used to detect DHODH. Both 700 and 800 channels are shown.

**a****143B Cytb- $\Delta$ -NDUFS2\_KO1-AOX****LbNOX****RFP****Mito****Cyto**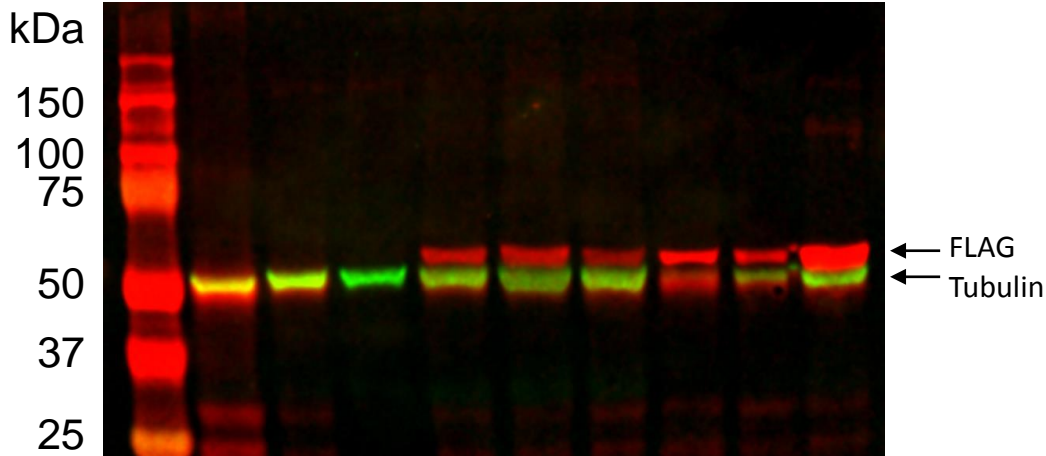**b****143B Cytb- $\Delta$ -NDUFS2\_KO1-AOX****LbNOX****RFP****Mito****Cyto**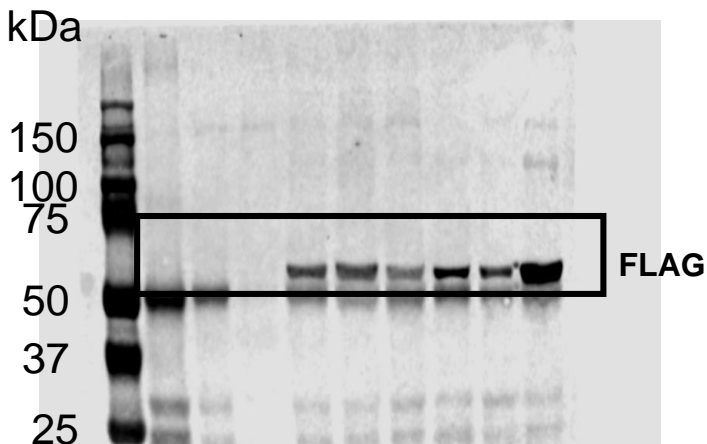**143B Cytb- $\Delta$ -NDUFS2\_KO1-AOX****LbNOX****RFP****Mito****Cyto**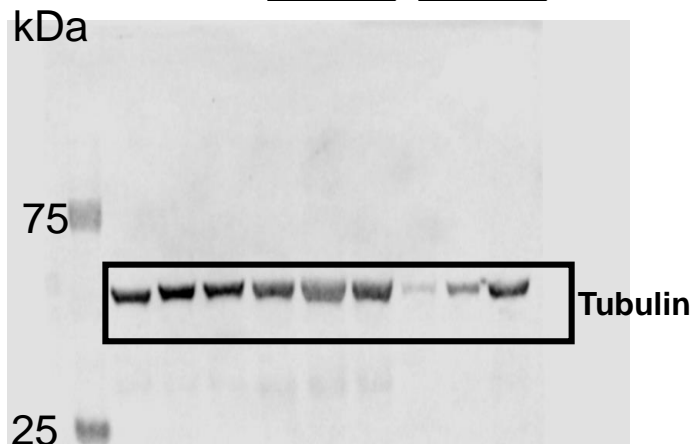

**Supplementary Figure 5. Original western blots for Extended Figure 8g.** The full, uncut gel images of Extended Figure 8g (a) are shown. Control Tubulin was run on the same gel as loading control. IRDye 800CW goat anti-rabbit secondary antibody was used to detect Tubulin while IRDye 680RD goat anti-mouse secondary was used to detect FLAG. In figure b only channel 700 (left) or 800 (right) is shown.

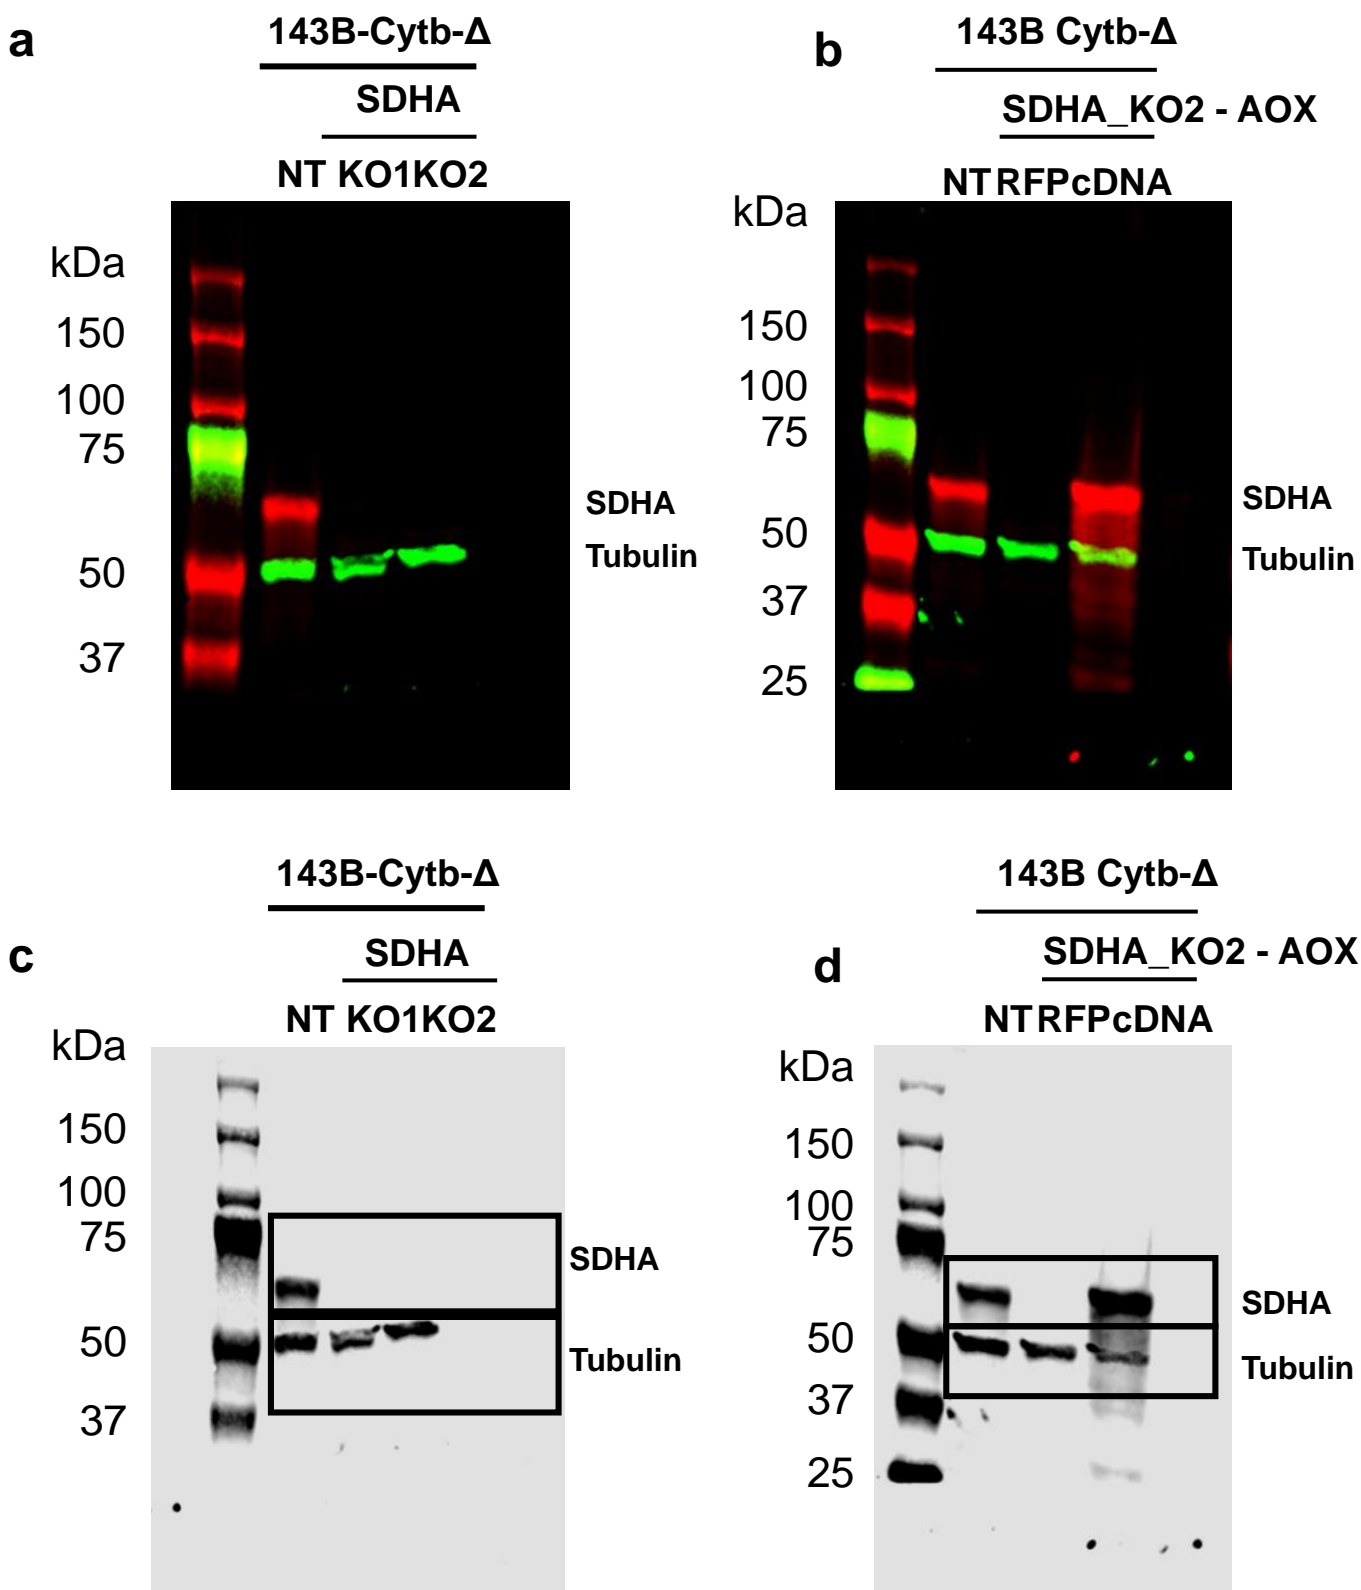

**Supplementary Figure 6. Original western blots for Extended Figure 10b and Extended Figure 11a.** The full, uncut gel images of Extended Figure 10b (a) and Extended Figure 11a (b) are shown. Control Tubulin was run on the same gel as loading control. IRDye 800CW goat anti-rabbit secondary antibody was used to detect Tubulin while IRDye 680RD goat anti-mouse secondary was used to detect SDHA. In figure a-d both 700 and 800 channels are shown.
